# Supplementary material for: Hsc70-2 is required for Beet black scorch virus infection through interaction with replication and capsid proteins
Source: PubMed Central journal article supplement (PMC5852052; doi:10.1038/s41598-018-22778-9), 2018-03-14
Supplement: 41598_2018_22778_MOESM1_ESM.pdf [file 41598_2018_22778_MOESM1_ESM.pdf]

**Hsc70-2 is required for *Beet black scorch virus* infection through interaction with replication and capsid proteins**

Xiaoling Wang<sup>1+</sup>, Xiuling Cao<sup>1+</sup>, Min Liu<sup>1</sup>, Ruiqi Zhang<sup>1</sup>, Xin Zhang<sup>1</sup>, Zongyu Gao<sup>1</sup>, Xiaofei Zhao<sup>1</sup>, Kai Xu<sup>2</sup>, Dawei Li<sup>1</sup> & Yongliang Zhang<sup>1\*</sup>

**Supplementary Information**

## Supplementary Figures

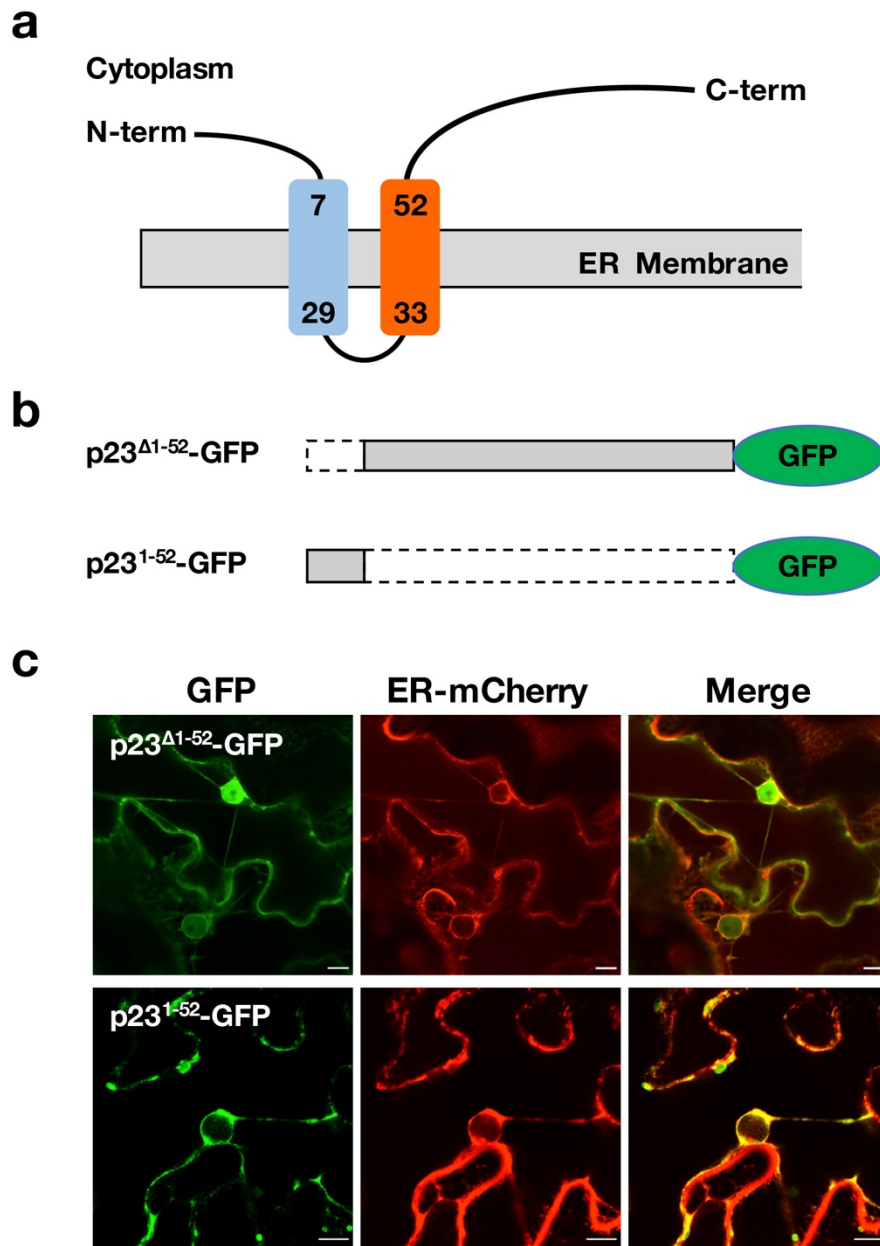

**Supplementary Figure S1. The N-terminal 52 amino acids contain transmembrane region of p23.**

(a) Schematic illustration of p23 orientation in ER membrane. The N-terminal two transmembrane helices are shown as bars traversing the bilayer membrane. (b) Diagram of the N-terminal and C-terminal truncation mutants of p23 that were fused with GFP. (c) Subcellular localization of p23<sup>Δ1-52</sup>-GFP and p23<sup>1-52</sup>-GFP in agroinfiltrated leaves of *N. benthamiana* at 3 dpi. Scale bars, 10  $\mu$ m.

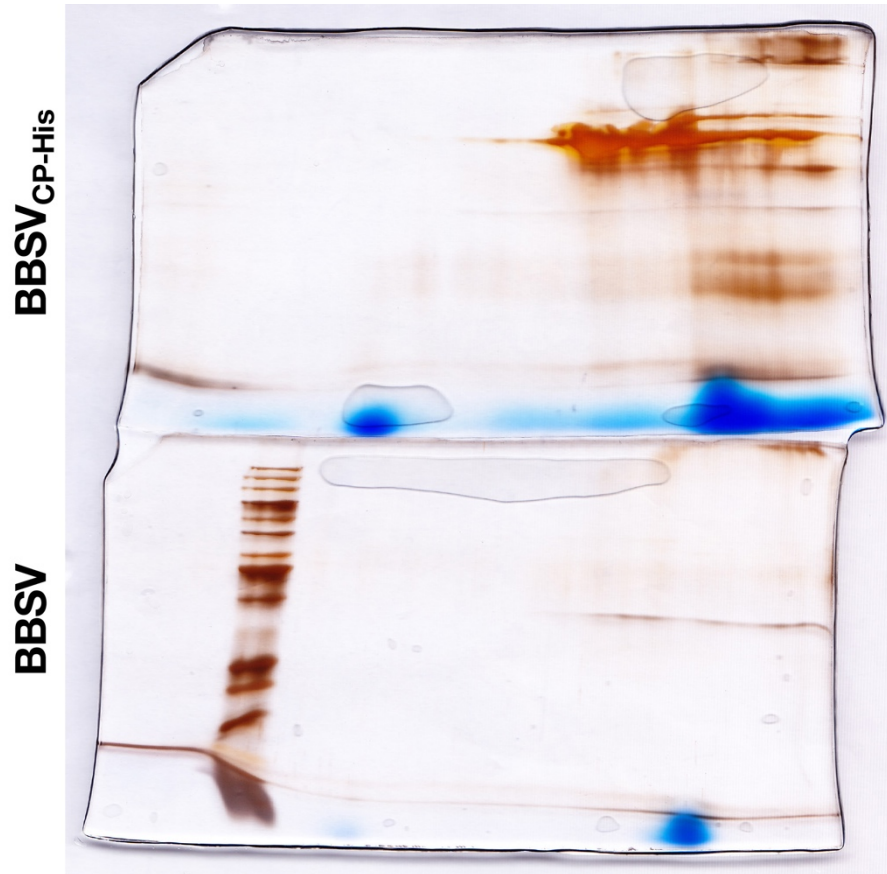

**Supplementary Figure S2. Original images of silver-stained polyacrylamide gels shown in Figure 1g.**

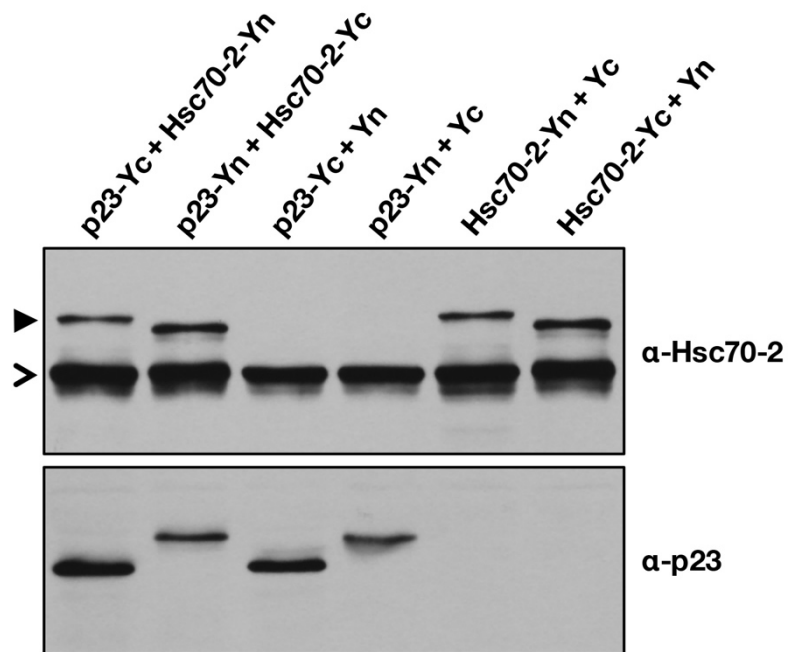

**Supplementary Figure S3. Western blot analysis of total protein extracts from the infiltrated *N. benthamiana* leaves shown in Figure 2a.**

Bands corresponding to the endogenous Hsp70s are indicated by open arrowhead, whereas solid arrowheads point to various Hsc70-2 fusions.

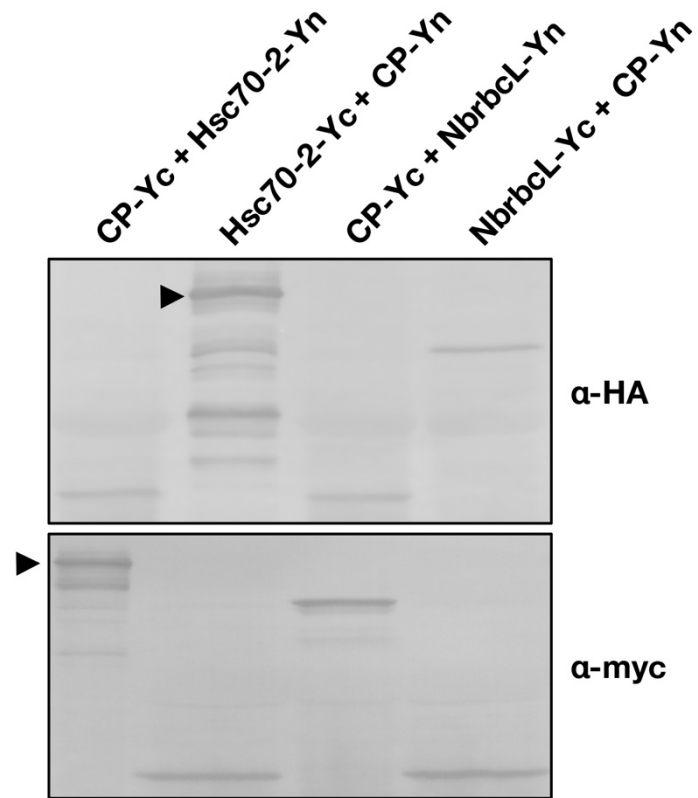

**Supplementary Figure S4. Western blot analysis of total protein extracts from the infiltrated *N. benthamiana* leaves shown in Figure 2b.**

Solid arrowheads indicate the Hsc70-2 fusions.

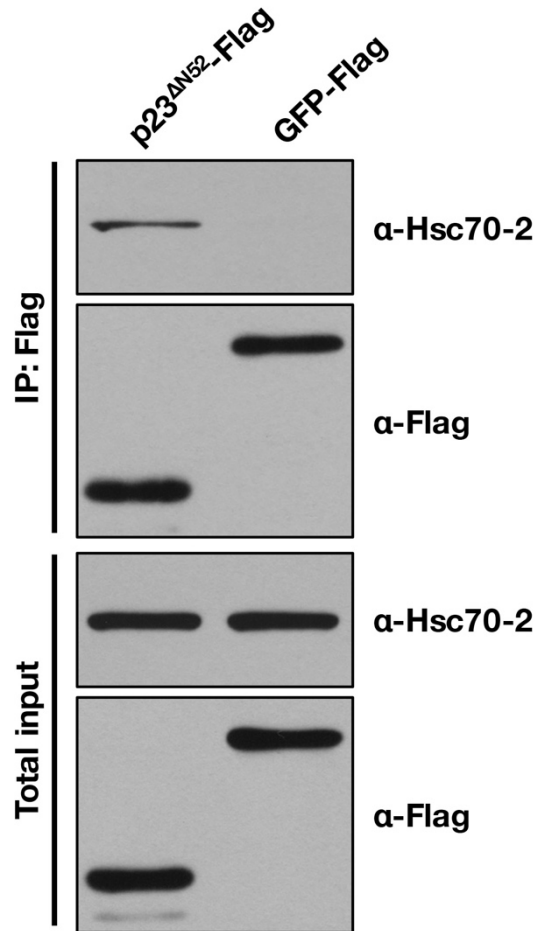

**Supplementary Figure S5. Analysis of the interaction between Hsc70-2 and p23<sup>AN52</sup> by Co-IP.** GFP-Flag protein served as the negative control.

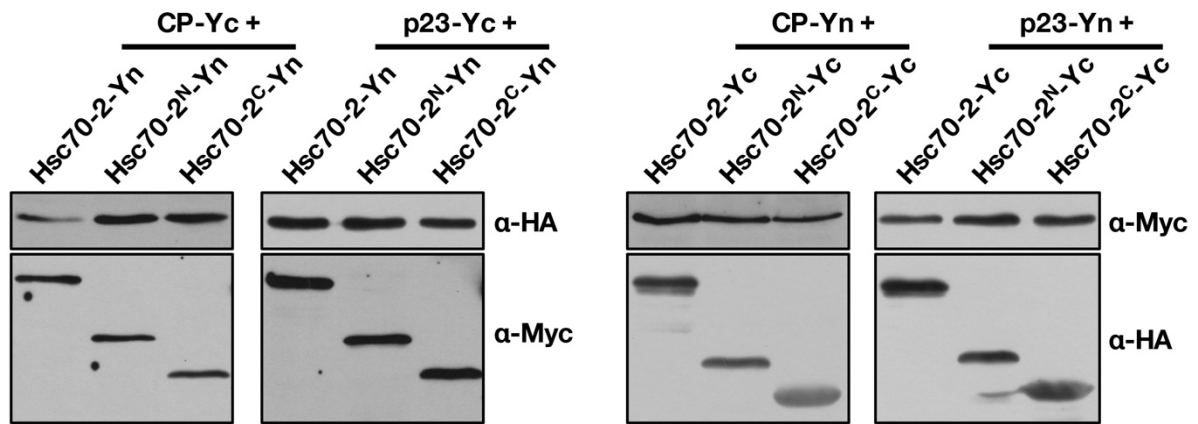

**Supplementary Figure S6. Western blot analysis of total protein extracts from the infiltrated *N. benthamiana* leaves shown in Figure 3.**

Various combinations of the split YFP fusions are indicated above the panels.

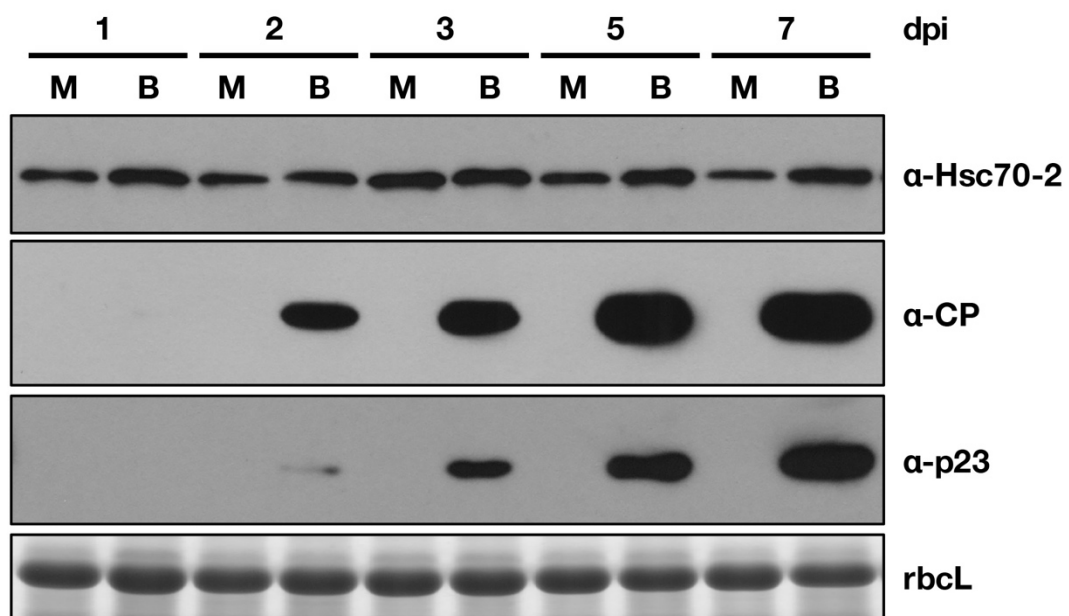

**Supplementary Figure S7. Western blot analysis of Hsc70-2, CP, and p23 in mock and BBSV-inoculated *N. benthamiana* leaves at different time-points indicated above the panels.**

M: buffer-treated leaves, B: BBSV-inoculated leaves. The antibodies used for Western blot analysis are indicated on the right. CBB-stained rbcL is shown as the protein loading control.



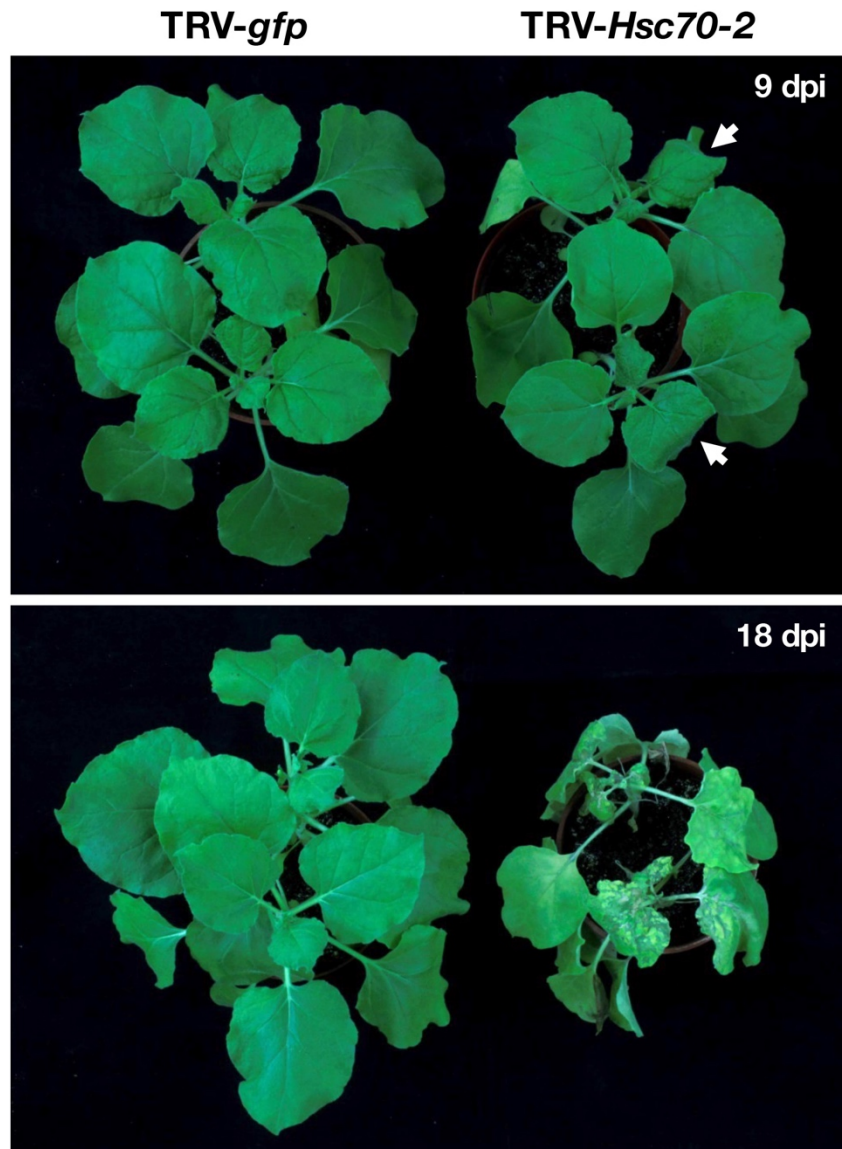

**Supplementary Figure S8. Observation of the phenotypes of TRV-*gfp*- and TRV-*Hsc70-2*-inoculated *N. benthamiana* plants at 9 and 18 dpi. Arrowheads indicate the leaves showing silencing phenotype.**

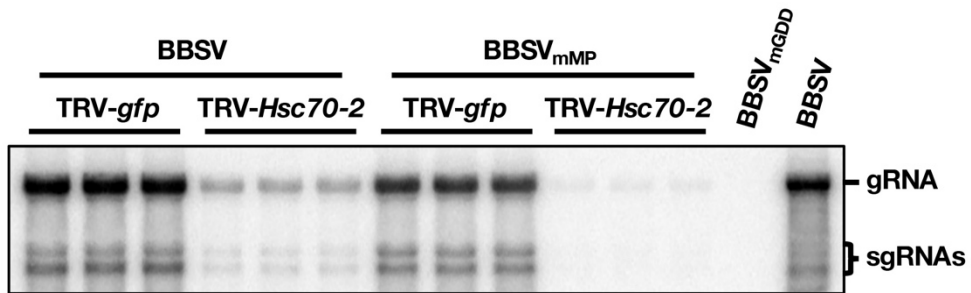

**Supplementary Figure S9. Overexposure image of Northern blot results showed in Figure 5a.**

**a**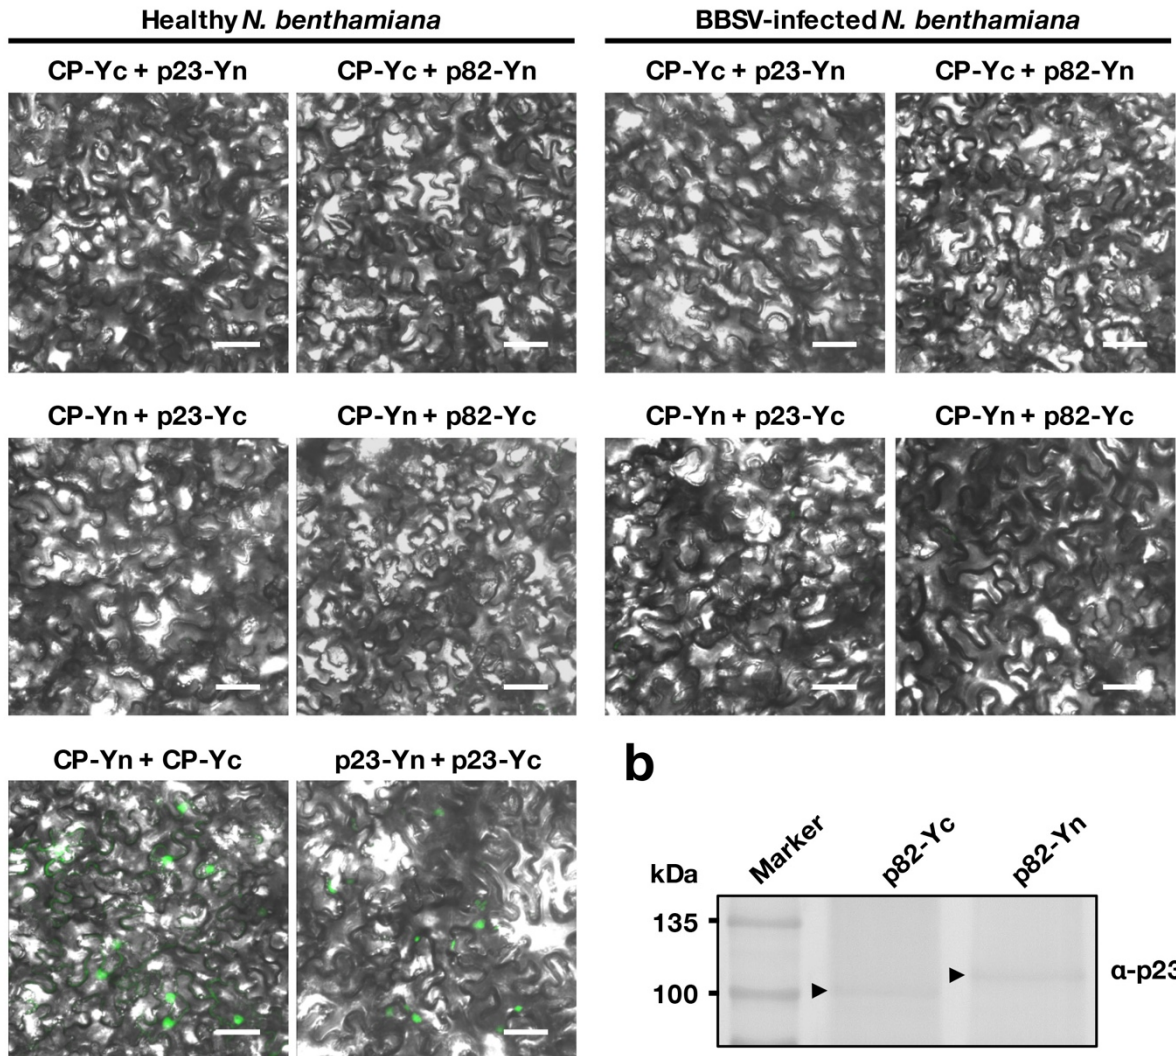**Supplementary Figure S10. CP does not interact with BBSV replication proteins.**

(a) BiFC analyses of interactions between CP and p23, and between CP and p82 in healthy and BBSV-infected *N. benthamiana* leaves. Self-interactions of CP and p23 served as positive controls. Combinations of BiFC constructs are shown above each panel. Healthy and BBSV-infected plants are indicated on the top of the panels. Scale bars, 50  $\mu$ m. (b) Western blot analyses of p82-Yn and p82-Yc proteins using antibody against p23.

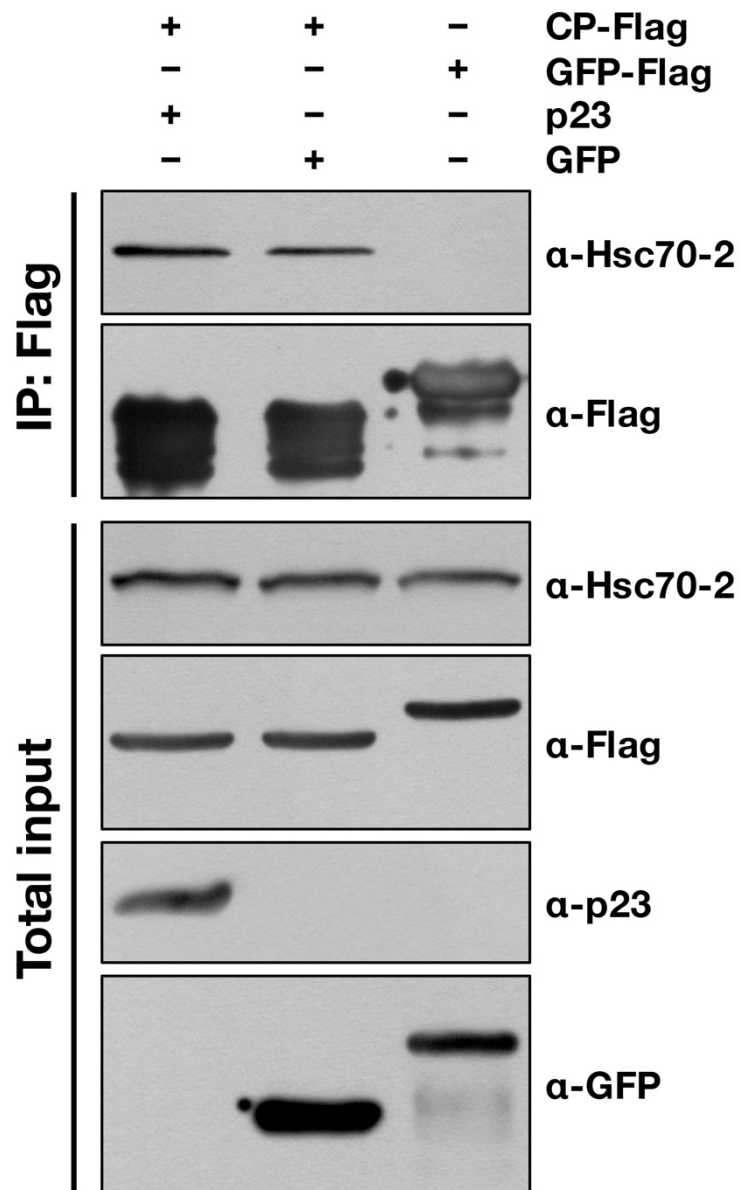

**Supplementary Figure S11. p23 has no obvious effect on the interaction between Hsc70-2 and CP.**

*N. benthamiana* leaves were co-infiltrated with *Agrobacterium* cells carrying different constructs as shown above the panel. Co-IP analyses were conducted at 3 dpi.

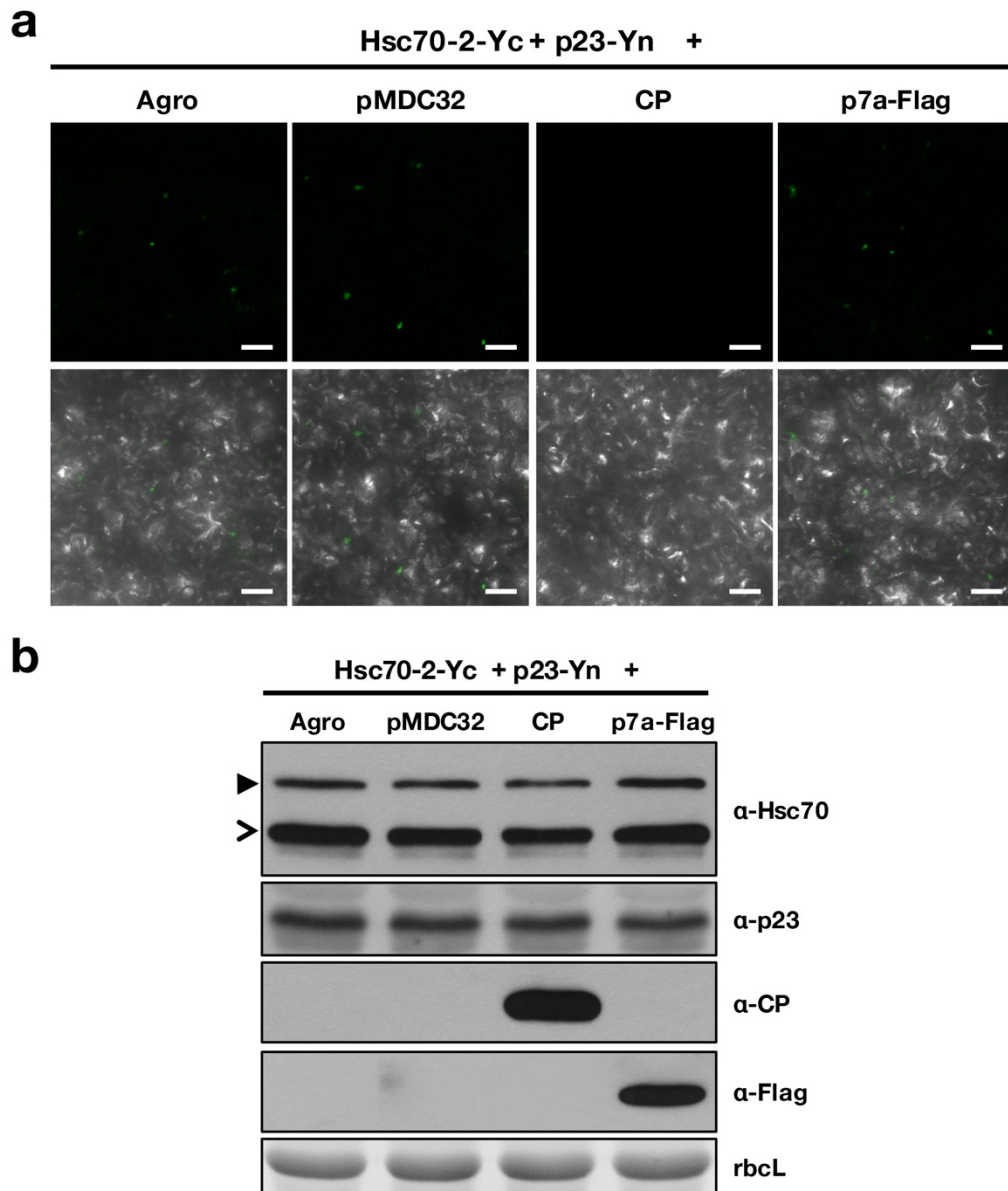

**Supplementary Figure S12. p7a has no obvious influence on the interaction of Hsc70-2 with p23.**

**(a)** BiFC analysis of the effect of CP and p7a on the interaction between Hsc70-2 and p23. *N. benthamiana* leaves co-infiltrated with *Agrobacterium* cells containing BiFC constructs and pMDC32, pMDC32-CP or pMDC32-p7a-Flag at an OD<sub>600</sub> of 0.2 and 1.2, respectively. Agro indicates the *Agrobacterium* cells without carrying the plasmid. Confocal microscopic analyses were carried out at 3 dpi. Different combinations of constructs used for agroinfiltration are indicated on the top. Scale bars, 60 μm. **(b)** Western blot analysis of total protein extracts from infiltrated leaves corresponding to (a). The open arrowheads point to the bands of endogenous Hsc70-2, whereas solid arrowhead indicates the Yc-fused Hsc70-2. Antibodies used for probing the target proteins are indicated on the right side of each blot. Sample loading was assessed by CBB-stained rbcL.

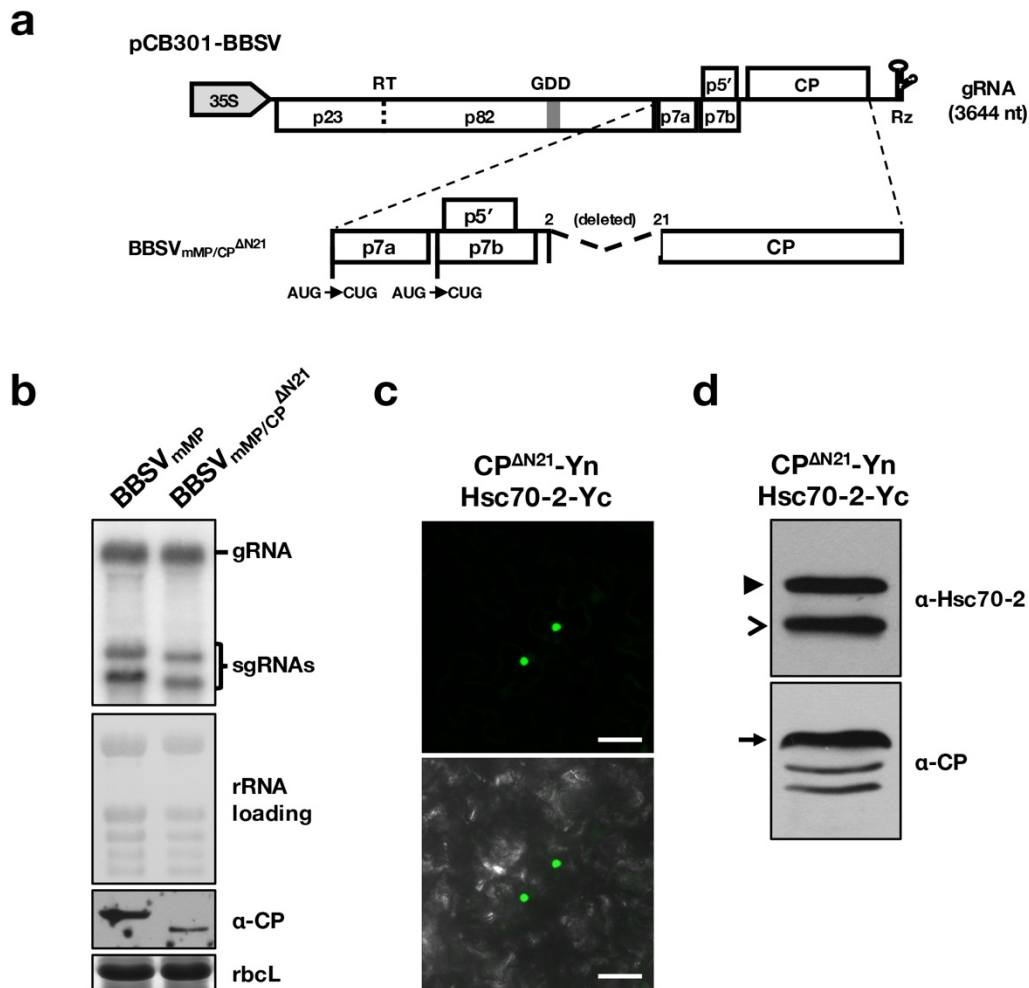

**Supplementary Figure S13. Disruption of RNA binding domain within the CP has minor effect on its ability to inhibit the BBSV replication.**

**(a)** Schematic representation of  $BBSV_{mMP/CP}^{\Delta N21}$  used in *Agrobacterium tumefaciens*-mediated infection assay. **(b)** Analysis of the accumulation of the BBSV-derived mutants in *N. benthamiana* leaves. Bands corresponding to gRNA and sgRNAs as well as the antibodies used for Western blot analysis are indicated on the right. Methylene blue-stained rRNAs and CBB-stained *rbcL* were used as RNA and protein loading controls, respectively. **(c)** BiFC analysis of interaction between  $CP^{\Delta N21}$  and Hsc70-2 in *N. benthamiana* leaves. Scale bars, 50  $\mu$ m. **(d)** Western blot analysis of total protein extracts from infiltrated leaves corresponding to (c). The antibodies used for Western blot analysis are indicated on the right. Band corresponding to the endogenous Hsc70-2 is indicated by open arrowhead, while solid arrowhead points to the Yc-fused Hsc70-2. The arrow indicates the band of  $CP^{\Delta N21}$ -Yn.

## **Method used in performing the experiments shown in Supplementary Figure S2**

### **Blue native polyacrylamide gel electrophoresis (BN-PAGE) assay**

BN-PAGE analyses were performed as described previously<sup>1</sup> with minor modifications. Total soluble proteins extracted from *N. benthamiana* plants infected with wild-type BBSV or BBSV<sub>CP-His</sub> were subjected to affinity purification using Ni-NTA agarose. The purified complexes were then mixed with 40% (v/v) glycerol and separated under native conditions by BN-PAGE in a first dimension. The gel was excised and separated using denaturing SDS-PAGE followed by silver staining.

### **Supplementary reference**

1. Swamy, M., Siegers, G. M., Minguet, S., Wollscheid, B. & Schamel, W. W. Blue native polyacrylamide gel electrophoresis (BN-PAGE) for the identification and analysis of multiprotein complexes. *Sci. STKE* **2006**, pl4 (2006).

**Supplementary Table S1** Primers used in this study.

| Primer                                 | Primer sequence (5'-3') <sup>a</sup>                                  | Position and description <sup>b</sup> | Purpose                          | Experiment                                                 |       |
|----------------------------------------|-----------------------------------------------------------------------|---------------------------------------|----------------------------------|------------------------------------------------------------|-------|
| F-BBSV                                 | ctctatataaggaagttcatttcatttggagaggAAGAAACCTAACCAGTTTCTCGTTG           | gRNA nt 1-25                          | pCB301-BBSV                      | <i>Agrobacterium tumefaciens</i> -mediated infection assay |       |
| R-BBSV                                 | ccgcgaggaggtggagatgccatgccgaccgggGGGCACCTGGAAGACCAGGTATATA            | gRNA nt 3644-3620                     |                                  |                                                            |       |
| F-p7a                                  | ACCTAACCACTTTTCCTGGAAACAACAGCGTAG                                     | gRNA nt 2213-2244                     | pCB301-BBSV <sub>mMP</sub>       |                                                            |       |
| R-p7a                                  | CTACGCTGTTGTTCCAAGGAAAAGTGGTTAGGT                                     | gRNA nt 2244-2213                     |                                  |                                                            |       |
| F-p7b                                  | CATTTCCAATTCTGAACTGAGCATCATTTATG                                      | gRNA nt 2405-2436                     |                                  |                                                            |       |
| R-p7b                                  | CATAAATGATGCTCAAGTTTCAGAAGTGGAAATG                                    | gRNA nt 2436-2405                     |                                  |                                                            |       |
| F-CP                                   | CCTAAGCGCAATAAAGGAGGCCTAGTCTAGTCCCGCATGTCCGATGAGAC                    | gRNA nt 2653-2699                     | pCB301-BBSV <sub>mMP/mCP</sub>   |                                                            |       |
| R-CP                                   | GTCTCATCGGACATGCGGGACTACTAGCCTCCTTTATTGCGCTTAGG                       | gRNA nt 2699-2653                     |                                  |                                                            |       |
| F-p82                                  | GGCTTGCCAACAATGGTGCTGATTGCATGCTTGTCTGTC                               | gRNA nt 1606-1643                     | pCB301-BBSV <sub>mGDD</sub>      |                                                            |       |
| R-p82                                  | GACGACAAGCATGCAATCAAGCACCATTGTTGGCAAGCC                               | gRNA nt 1643-1606                     |                                  |                                                            |       |
| F <sub>His</sub> -CP                   | CACCACCATCATCATTAGATCCCACATCCTGGTGTG                                  | gRNA nt 3343-3363                     | pCPmx-7 <sup>His</sup>           | Intermediate vector                                        |       |
| R <sub>His</sub> -CP                   | GTGGCCACCTCATTAAATGGCAGCAGGTATTGGC                                    | gRNA nt 3342-3321                     |                                  |                                                            |       |
| F <sub>KpnI</sub> -p23                 | GGGGTACCggATGGATTCAATCCCGTATGTGATCCTGCGC                              | gRNA nt 36-65                         | pMDC32-p23-Flag                  | transient expression                                       |       |
| F <sub>KpnI</sub> -p23 <sup>ANS2</sup> | GGGGTACCggatgAAGATAAAGGTGGAAGTACACCCAGCCAC                            | gRNA nt 192-220                       |                                  |                                                            |       |
| R <sub>SpeI</sub> -p23                 | GACTAGTTTTTCCATATGAGGGCCCTAGTACGGCCC                                  | gRNA nt 644-616                       | pMDC32-p23 <sup>ANS2</sup> -Flag |                                                            |       |
| F <sub>KpnI</sub> -gfp                 | GGGGTACCggATGGTGAGCAAGGGCGAGG                                         | <i>eGFP</i> nb 1-19                   | pMDC32-GFP-Flag                  |                                                            |       |
| R <sub>SpeI</sub> -gfp                 | GACTAGTCTTGTACAGCTCGTCCATG                                            | <i>eGFP</i> nb 717-699                |                                  |                                                            |       |
| F-Hsc70                                | ATGGCCGAAAAGGTGAAGG                                                   | <i>Hsc70-2</i> nb 1-20                | p19T-Hsc70-2                     | cloning vector                                             |       |
| R-Hsc70                                | TTAGTCGACCTCCTCAATCTTGGG                                              | <i>Hsc70-2</i> nb 1947-1924           |                                  |                                                            |       |
| Fcz-Hsc70                              | gcttctgcagggccccgggATGGACTACAAAGACCATGACGGTG                          | Flag nb 1-25                          | pSuper1300-Flag-Hsc70-2          | transient expression                                       |       |
| Rez-Hsc70                              | ggatccactagtatttaaatgTTAGTCGACCTCCTCAATCTTGG                          | <i>Hsc70-2</i> nb 1947-1925           |                                  |                                                            |       |
| F <sub>KpnI</sub> -CP                  | GGGGTACCATGGCACCTAAGCGCAATAAAG                                        | gRNA nt 2647-2668                     | pMDC32-CP                        |                                                            |       |
| R <sub>PacI</sub> -CP                  | CCTTAATTAActAATTAATGGCAGCAGGTATTG                                     | gRNA nt 3345-3323                     |                                  |                                                            |       |
| R <sub>PacI</sub> -CP <sup>Flag</sup>  | CCTTAATTAActaAAGCTTGTTCATCGTCATCCTTGTAGCCACCTCCATTAATGGCAGCAGGTATTGGC | gRNA nt 3342-3321                     |                                  |                                                            |       |
| F <sub>Flag</sub> -Hsc70               | GATTACAAGGATGACGATGACAAGCTTGGAGGTGGCATGGCCGAAAAG                      | <i>Hsc70-2</i> nb 1-20                | p19T-Flag-Hsc70-2                |                                                            | Co-IP |



|                                     |                                                                           |                      |                             |                                         |      |
|-------------------------------------|---------------------------------------------------------------------------|----------------------|-----------------------------|-----------------------------------------|------|
|                                     | GTGAAGG                                                                   |                      |                             |                                         |      |
| R <sub>Flag</sub> -Hsc70            | GATATCATGATCTTTATAATCACCGTCATGGTCTTTGTAGTCCATcatAATCGT<br>CGACCTGCAGGCATG | Sequence of pMD19T   |                             |                                         |      |
| F <sub>DONR</sub> -Hsc70            | ggggacaagttgtacaaaaagcaggcttcATGGACTACAAAGACCATGAC                        | Flag nb 1-21         | pDONR-Hsc70-2               |                                         |      |
| R <sub>DONR</sub> -Hsc70            | ggggaccactttgtacaagaaagctgggtcTTAGTCGACCTCCTCAATC                         | Hsc70-2 nb 1947-1929 | pMDC32-Flag-Hsc70-2         |                                         |      |
| F <sub>SmaI</sub> -Hsc70            | TCCCCCGGGaATGGCCGAAAAGGTGAAG                                              | Hsc70-2 nb 1-19      | pGEX-Hsc70-2                | Protein expression                      |      |
| R <sub>HindIII</sub> -Hsc70         | CCCAAGCTTTTAGTCGACCTCCTCAATCTTGG                                          | Hsc70-2 nb 1947-1925 |                             |                                         |      |
| F <sub>MAL</sub> -p23               | attcagaattcggatcctctAAGATAAAGGTGGAAGTACACC                                | gRNA nt 192-213      | pMAL-p23 <sup>ΔN52</sup>    |                                         |      |
| R <sub>MAL</sub> -p23               | gcttcctgcaggtcgactCTATTTCCATATGAGGGCC                                     | gRNA nt 647-628      |                             |                                         |      |
| F <sub>NdeI</sub> -gfp              | GGGAATTCCATATGATGGTGAGCAAGGGCGAGG                                         | eGFP nb 1-19         | pET30a-GFP                  |                                         |      |
| R <sub>SaI</sub> -gfp               | ACGCGTCGACCTTGTACAGCTCGTCCATG                                             | eGFP nb 717-699      |                             |                                         |      |
| F <sub>BamHI</sub> -gfp             | CGGGATCCATGGTGAGCAAGGGCGAGG                                               | eGFP nb 1-19         | pGEX-GFP                    |                                         |      |
| R <sub>HindIII</sub> -gfp           | CCCAAGCTTTTACTTGTACAGCTCGTCCATG                                           | eGFP nb 720-701      |                             |                                         |      |
| F <sub>XbaI</sub> -Hsc70            | GCTCTAGAATGGCCGAAAAGGTGAAG                                                | Hsc70-2 nb 1-19      | pSPYCE-Hsc70-2              |                                         | BiFC |
| R <sub>SpeI</sub> -Hsc70            | GGACTAGTGTGACCTCCTCAATCTTGG                                               | Hsc70-2 nb 1944-1925 | pSPYNE-Hsc70-2              |                                         |      |
| F <sub>Cz</sub> -Hsc70 <sup>N</sup> | ggatccatgatagtagctgATGGCCGAAAAGGTGAAGG                                    | Hsc70-2 nb 1-20      | pSPYCE-Hsc70-2 <sup>N</sup> |                                         |      |
| R <sub>Cz</sub> -Hsc70 <sup>N</sup> | ggagcggtagcctcgaggtcCAACAAGTCTTGAACCTTCTC                                 | Hsc70-2 nb 1194-1174 | pSPYNE-Hsc70-2 <sup>N</sup> |                                         |      |
| F <sub>Cz</sub> -Hsc70 <sup>C</sup> | ggatccatgatagtagctgatCTTTTGGATGTGACCCCTCTATC                              | Hsc70-2 nb 1195-1217 | pSPYCE-Hsc70-2 <sup>C</sup> |                                         |      |
| R <sub>Cz</sub> -Hsc70 <sup>C</sup> | ggagcggtagcctcgaggtcGTCGACCTCCTCAATCTTGG                                  | Hsc70-2 nb 1944-1925 | pSPYNE-Hsc70-2 <sup>C</sup> |                                         |      |
| F <sub>XhoI</sub> -Hsc70            | CCGCTCGAGATGGCCGAAAAGGTGAAGGTC                                            | Hsc70-2 nb 1-22      | pTRV2-Hsc70-2               | VIGS                                    |      |
| R <sub>EcoRI</sub> -Hsc70           | CGGAATTCAGCAGCAAAGTCTTCTCTTC                                              | Hsc70-2 nb 360-340   |                             |                                         |      |
| F <sub>XhoI</sub> -GFP              | CCGCTCGAGTCAAGAGTGCCATGCCCGAA                                             | GFP II nb 251-270    | pTRV2-gfp                   |                                         |      |
| R <sub>BamHI</sub> -GFP             | CGCGGATCCCATCCATGCCATGTGTAATCCCA                                          | GFP II nb 703-681    |                             |                                         |      |
| F-EF1α                              | AGCTTTACCTCCCAAGTCATC                                                     | EF1α nb 979-999      | RT-qPCR                     |                                         |      |
| R-EF1α                              | AGAACGCCTGTCAATCTTGG                                                      | EF1α nb 1113-1094    |                             |                                         |      |
| F <sub>RT-qPCR</sub> -Hsc70         | AAGCCACAGCAGGAGACTCA                                                      | Hsc70-2 nb 677-698   |                             |                                         |      |
| R <sub>RT-qPCR</sub> -Hsc70         | TTCGCCCTCTCACATGCTGTCC                                                    | Hsc70-2 nb 830-809   |                             |                                         |      |
| F-nb                                | ATGGCACCTAAGCGCAATAAAGG                                                   | gRNA nt 2647-2669    |                             | Template of BBSV 3'-UTR-specific probes |      |
| R-nb                                | GGGCACCTGGAAGACCAGGT                                                      | gRNA nt 3644-3625    |                             |                                         |      |

<sup>a</sup> Underlined letters indicate restriction enzyme sites, lowercase letters indicate sequences used for recombination or extra nucleotides introduced into the original sequences, italic letters indicate tag sequences. Letters in the rectangles denote mutated nucleotides.

<sup>b</sup> Numbers correspond to target nucleotide positions; a reverse order of numbers indicates that the primer is complementary to the targeted sequences.
